# Supplementary material
Source: bioRxiv or medRxiv preprint supplement (https://medrxiv.org/content/medrxiv/early/2021/05/11/2021.05.10.21256880/DC2/embed/media-2.pdf)
Supplement: Supplementary file [file media-2.pdf]

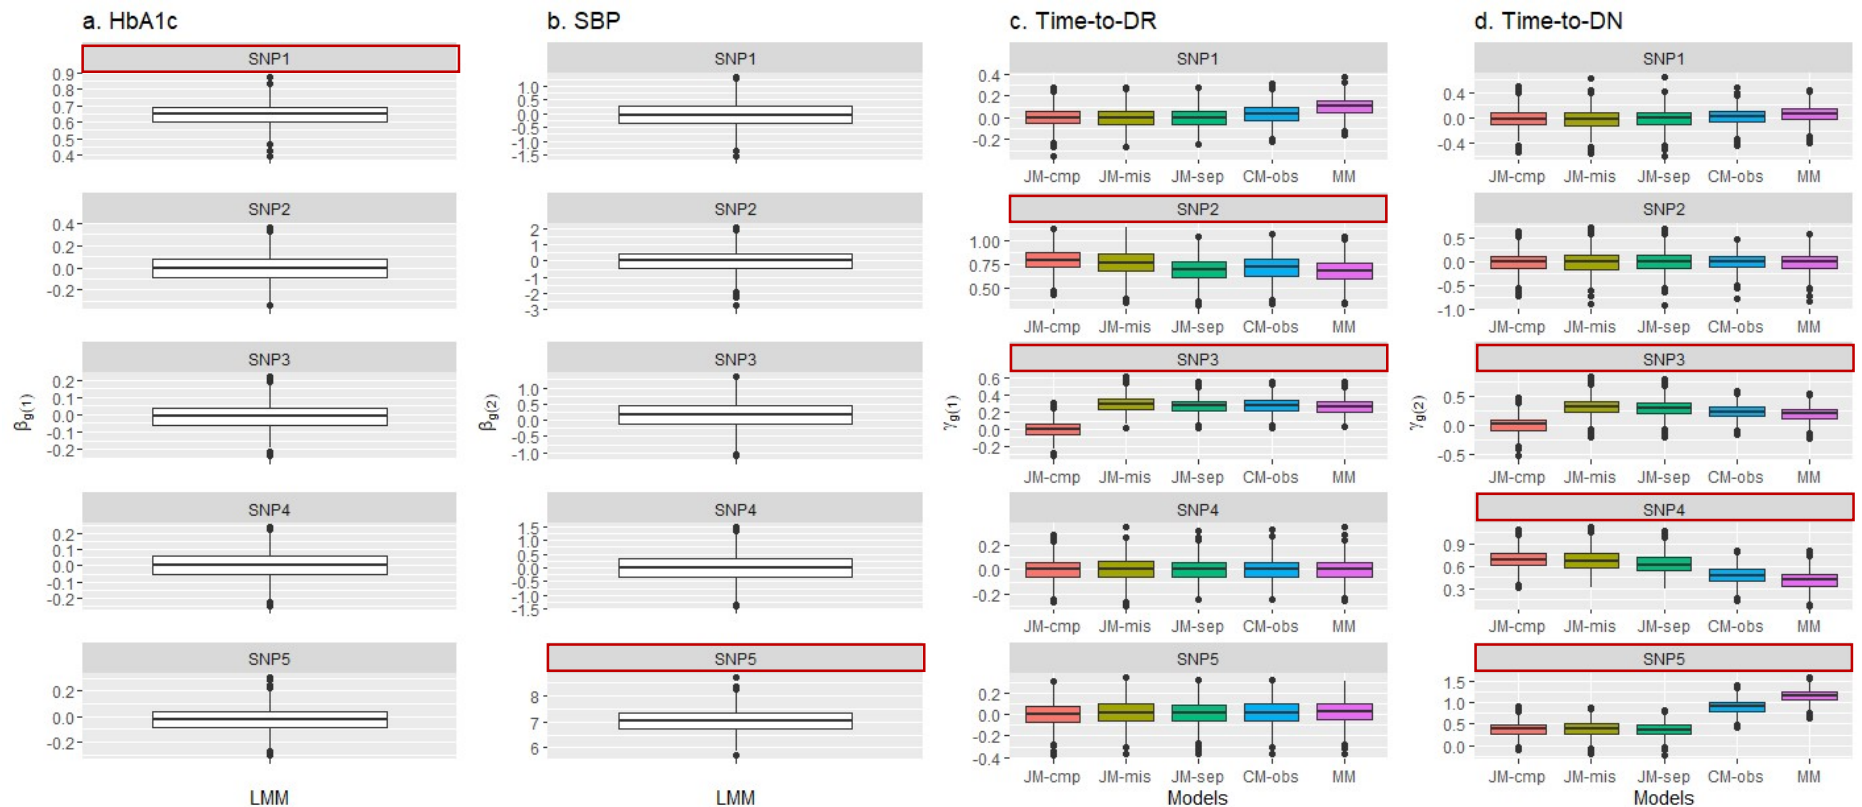

**Figure S1.** SNP effects estimated by the joint models (JM-cmp, JM-mis, JM-sep) for each SNP on (a.) HbA1c ( $\beta_{g(1)}$ ), (b.) SBP ( $\beta_{g(2)}$ ), (c.) Time-to-DR ( $\gamma_{g(1)}$ ) and (d.) Time-to-DN ( $\gamma_{g(2)}$ ), assessed using  $R=1000$  replicates of  $N=667$  DCCT subjects simulated under the causal genetic scenario from Figure 2. For (a.) and (b.), estimates from the multivariate linear mixed models (LMM) are the same for JM-cmp, JM-mis and JM-sep. For (c.) and (d.), we also compare the estimates from the joint models with the estimates from CM-obs and from marginal time-to-event models (MM). For each longitudinal (a., b.) or time-to-event trait (c., d.), causal SNP associations are indicated by red boxes. For SNP3 which has indirect effects on both time-to-T1DC traits via the unmeasured risk factor  $U$ , all methods except JM-cmp, exhibit a biased estimate of direct effect, which captures some of the indirect SNP3 effect via  $U$ , ignored from the time-to-event sub-models. For SNP5 with direct and indirect effects on time-to-DN induced via SBP, CM-obs and MM overestimate the direct SNP5 effect due to ignoring measurement errors in SBP (CM-obs) or ignoring the indirect effect of SNP5 via SBP (MM).

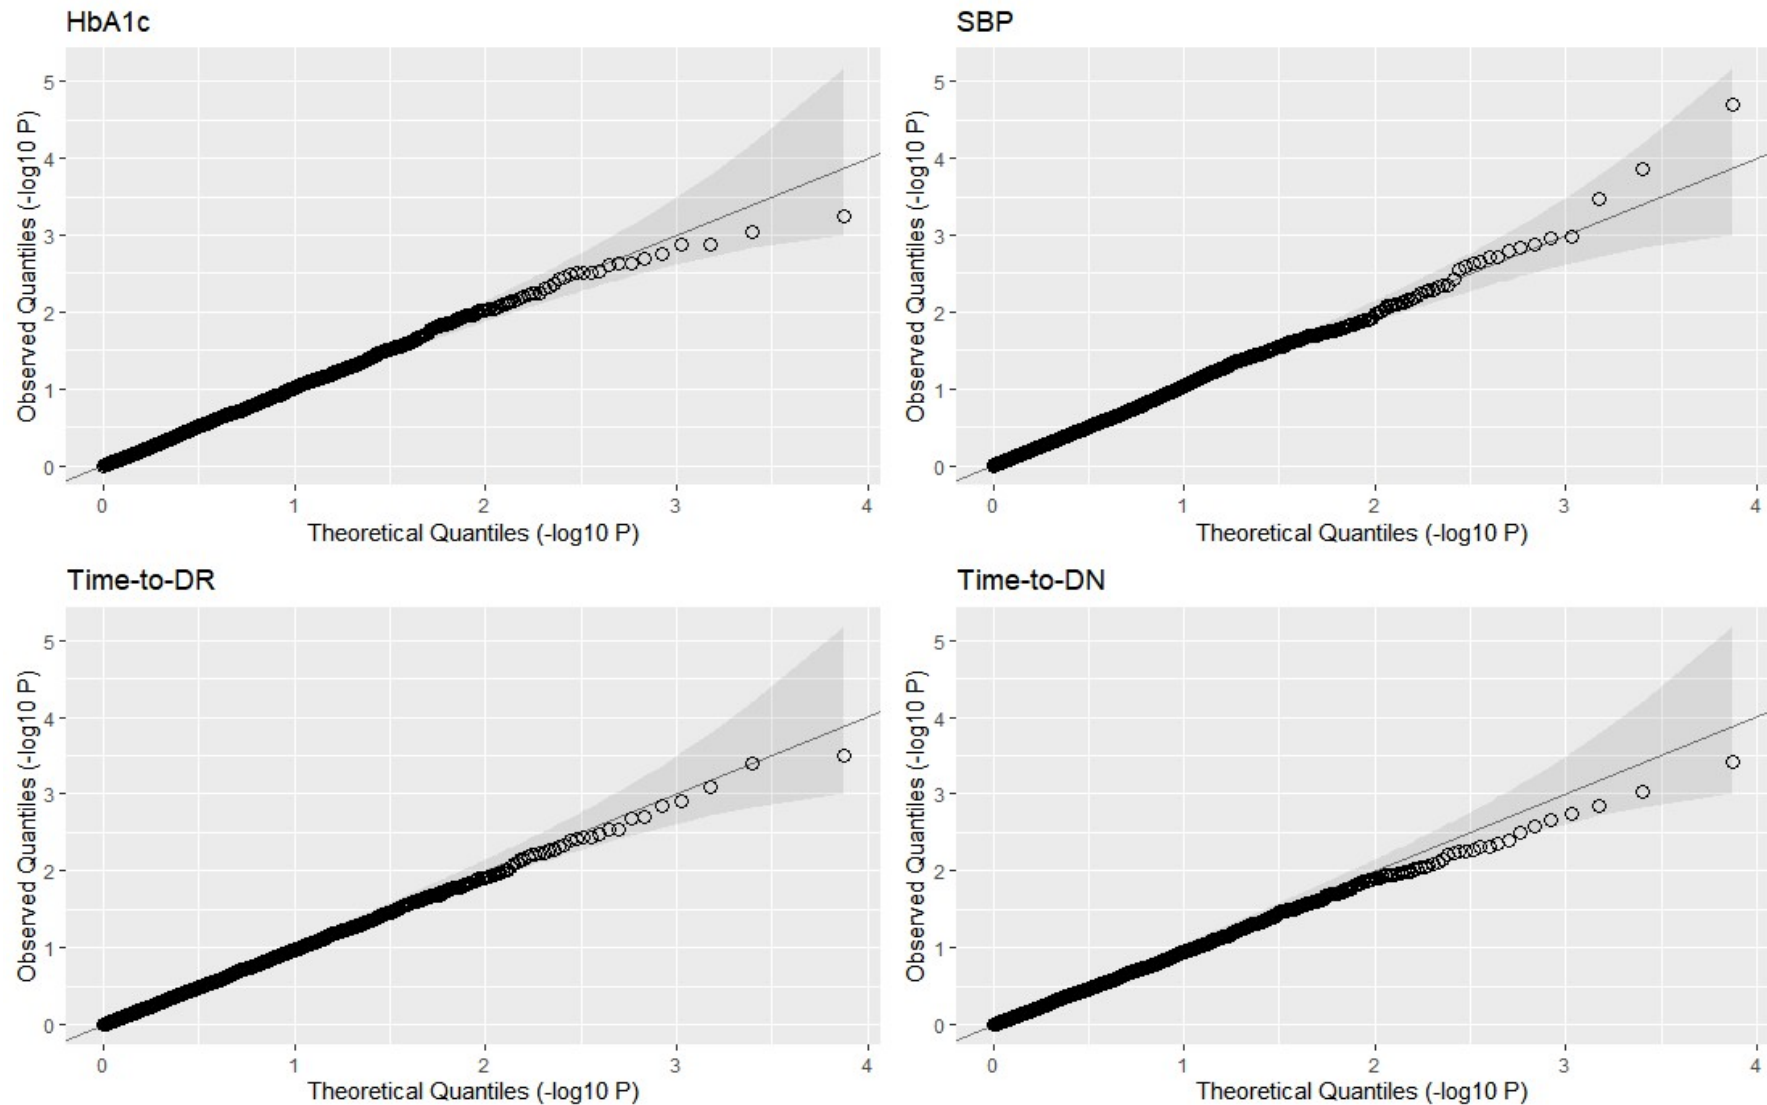

**Figure S2.** Quantile-quantile plots of the  $P$ -values from the Wald tests for each SNP effect in longitudinal (upper) and time-to-event components (bottom) of the complete joint model (JM-cmp), assessed using  $R=1000$  replicates of  $N=667$  DCCT subjects simulated under the *global null genetic scenario*. For each trait, SNP association  $P$ -values obtained for all  $M=5$  SNPs and all replicates are pooled, yielding  $R=5000$  replicates per plot.

**Figure S3.** Classification rates of each SNP as direct and/or indirect association with each time-to-event trait through each longitudinal trait, assessed using  $R=1000$  replicates of  $N=667$  DCCT subjects simulated under the *global null genetic scenario*. Panels with classification rates for associations presented in Table 3 are indicated by red boxes. For SNP3 which has indirect effects on time-to-T1DC traits induced via  $U$ , assumed *unmeasured*, the hypothesis testing procedure detect it as a direct association. As explained in *Materials and Methods*, joint models are fitted separately for each SNP, and the SNP association is tested with each of the longitudinal traits (HbA1c, SBP) and each of the time-to-T1DC traits (time-to-DR, time-to-DN).

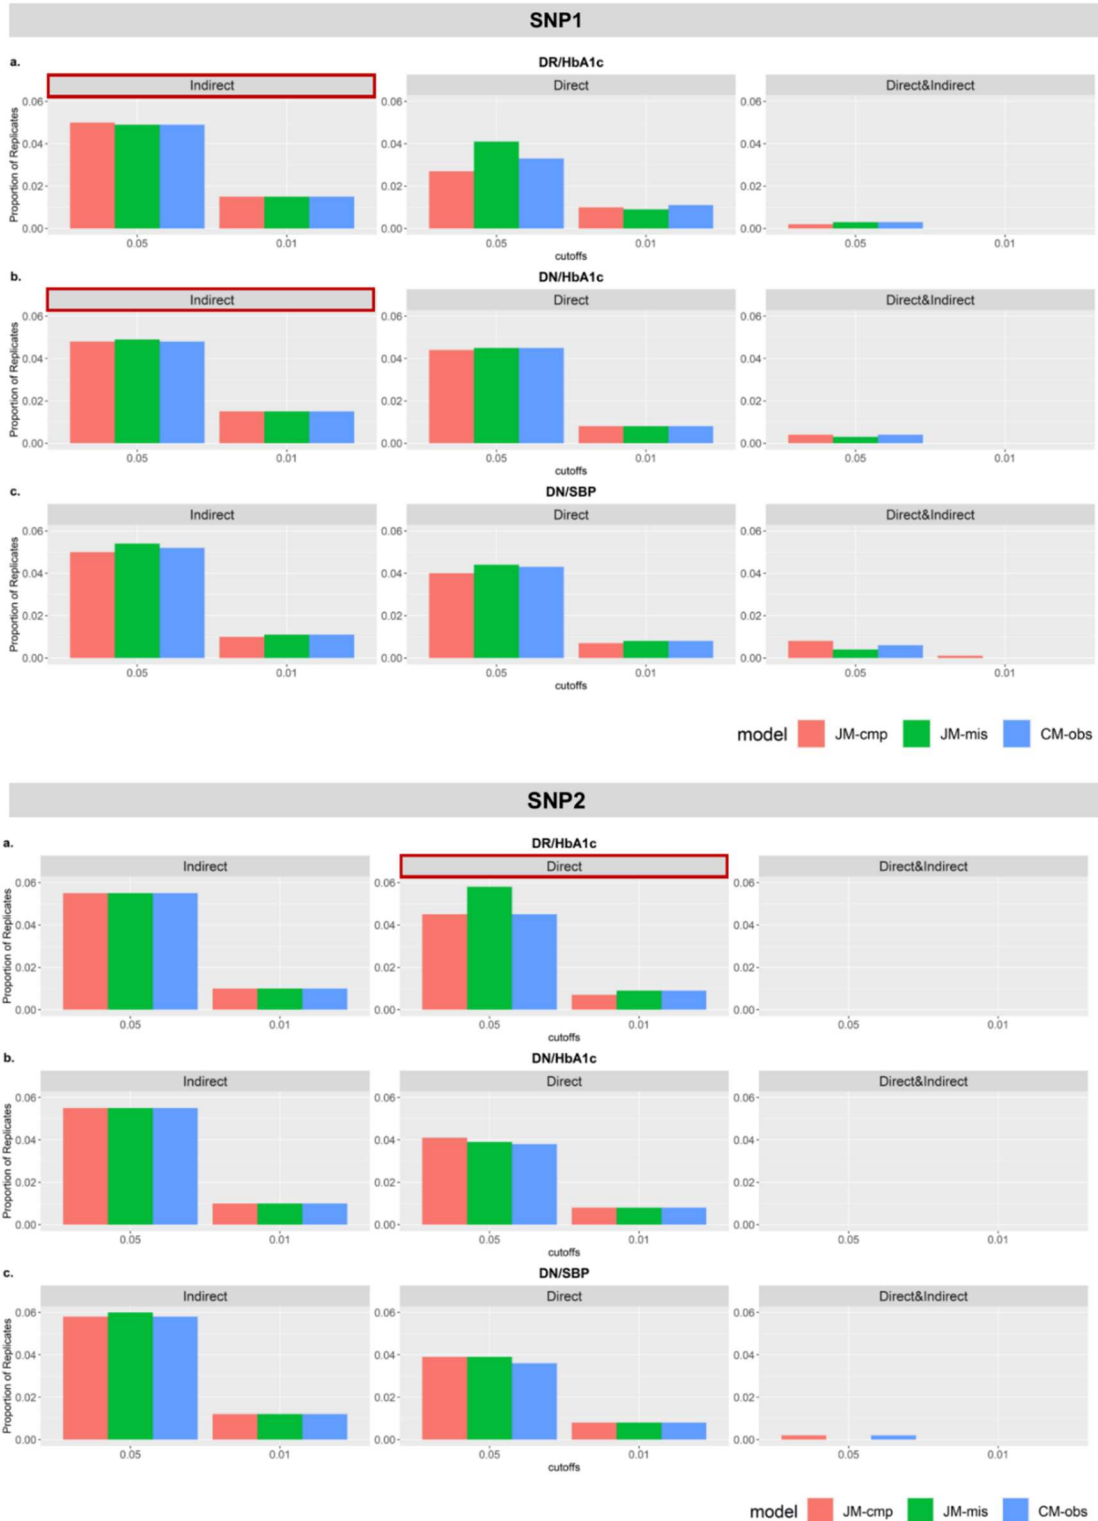

### SNP3

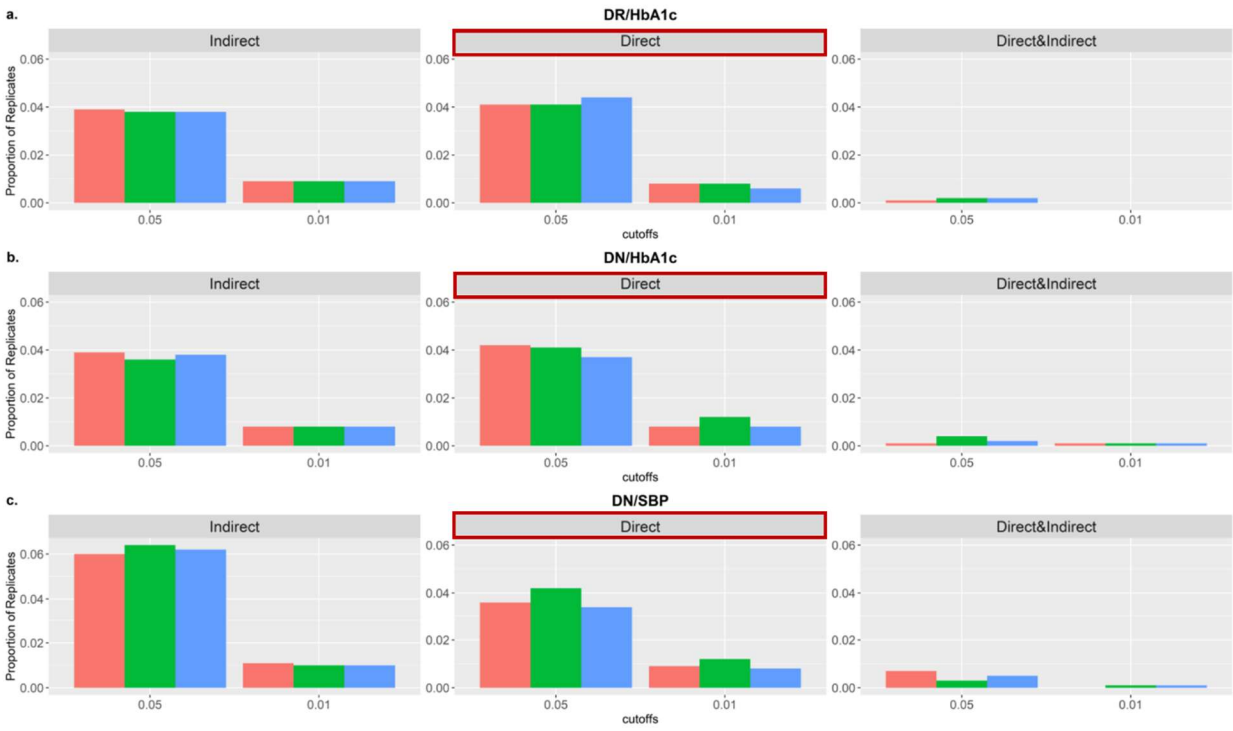

### SNP4

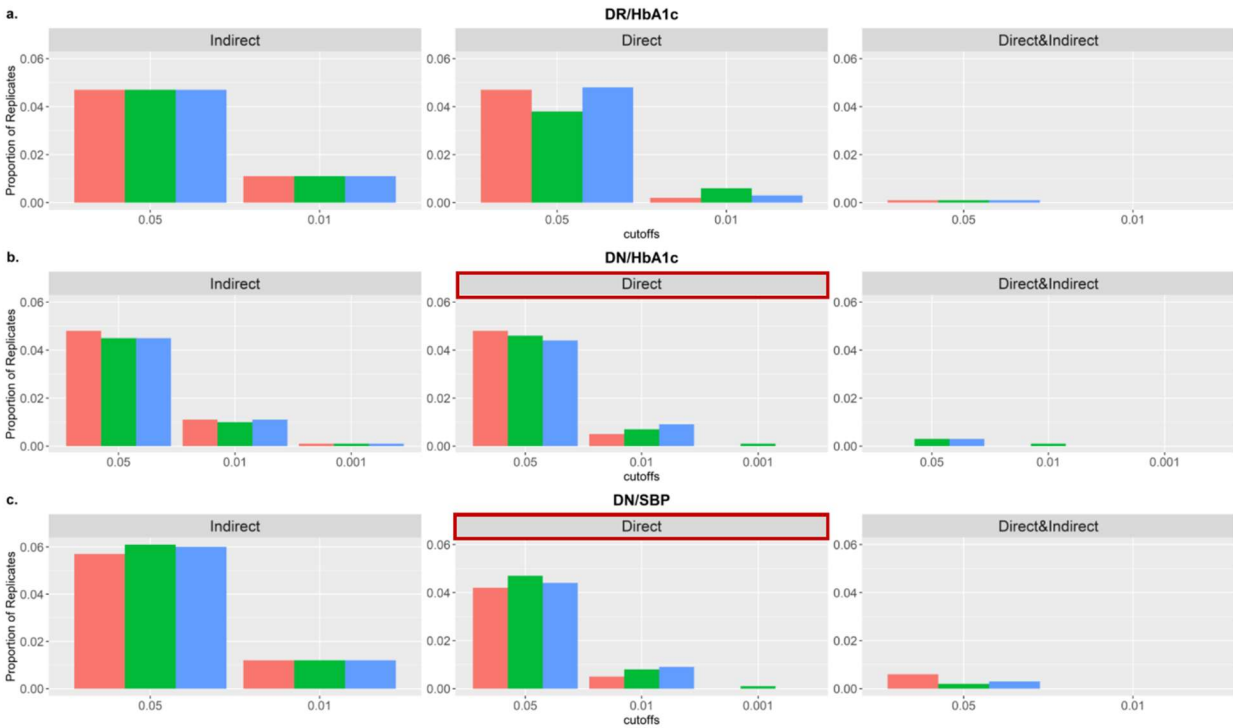

model JM-cmp JM-mis CM-obs

# SNP5

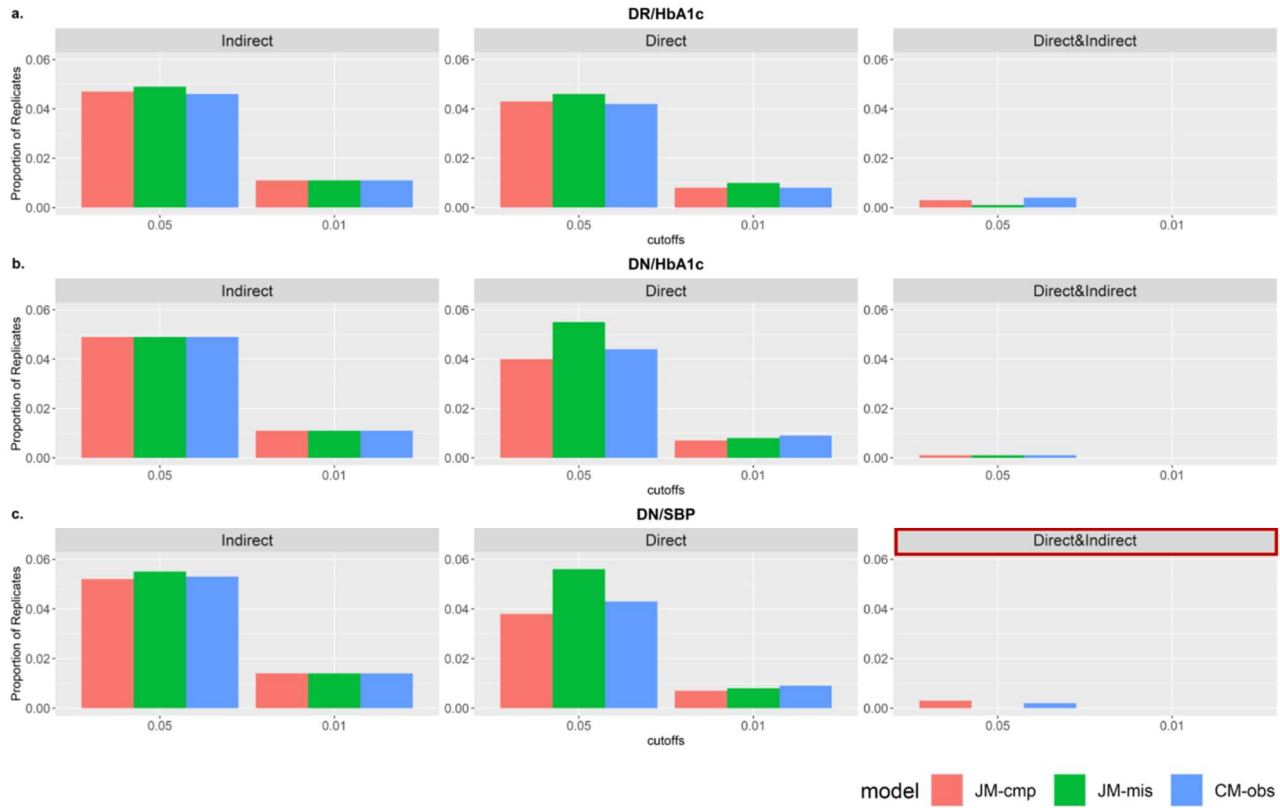

**Figure S4. Classification rates of each SNP as direct and/or indirect association with each time-to-event trait through each longitudinal trait, assessed using  $R=1000$  replicates of  $N=667$  DCCT subjects simulated under the *causal* genetic scenario from Figure 2. Panels with underlying causal associations are indicated by red boxes for each SNP; other associations represent misclassified associations. For SNP3 which has indirect effects on both time-to-T1DC traits, induced via  $U$ , assumed *unmeasured*, the hypothesis testing procedure detect it as a direct association. As explained in *Materials and Methods*, joint models are fitted separately for each SNP, and the SNP association is tested with each of the longitudinal traits (HbA1c, SBP) and each of the time-to-T1DC traits (time-to-DR, time-to-DN).**

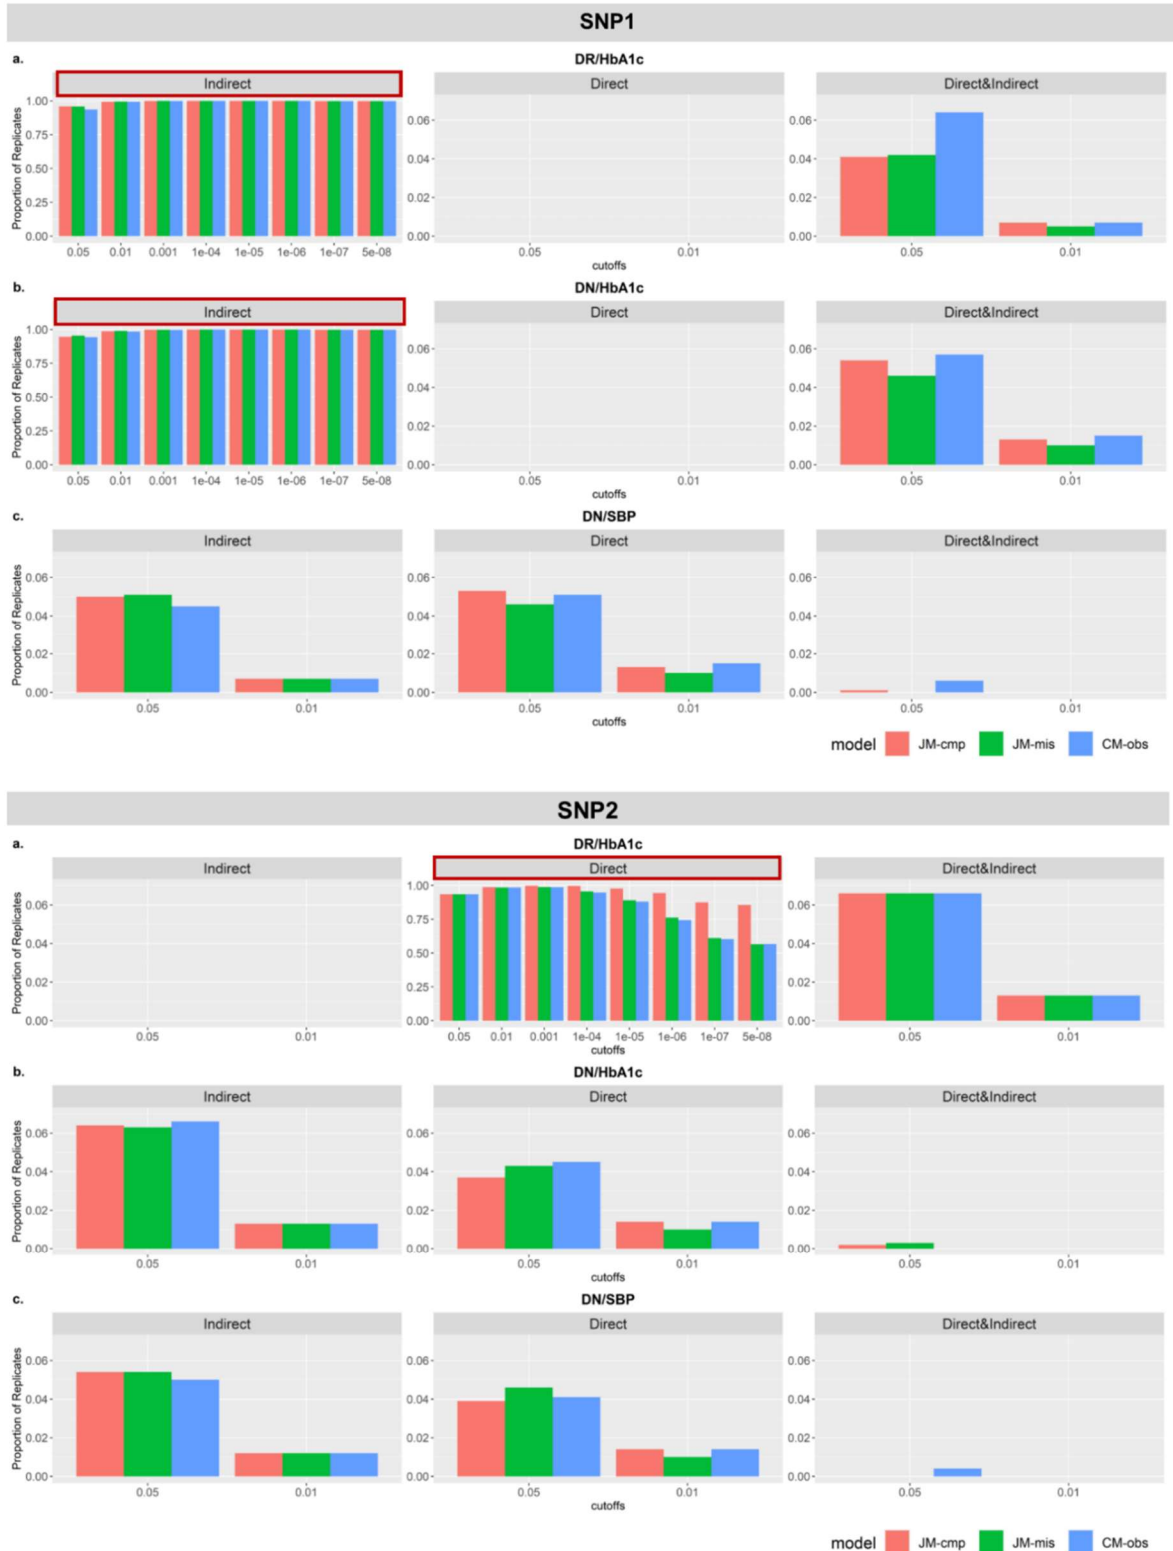

### SNP3

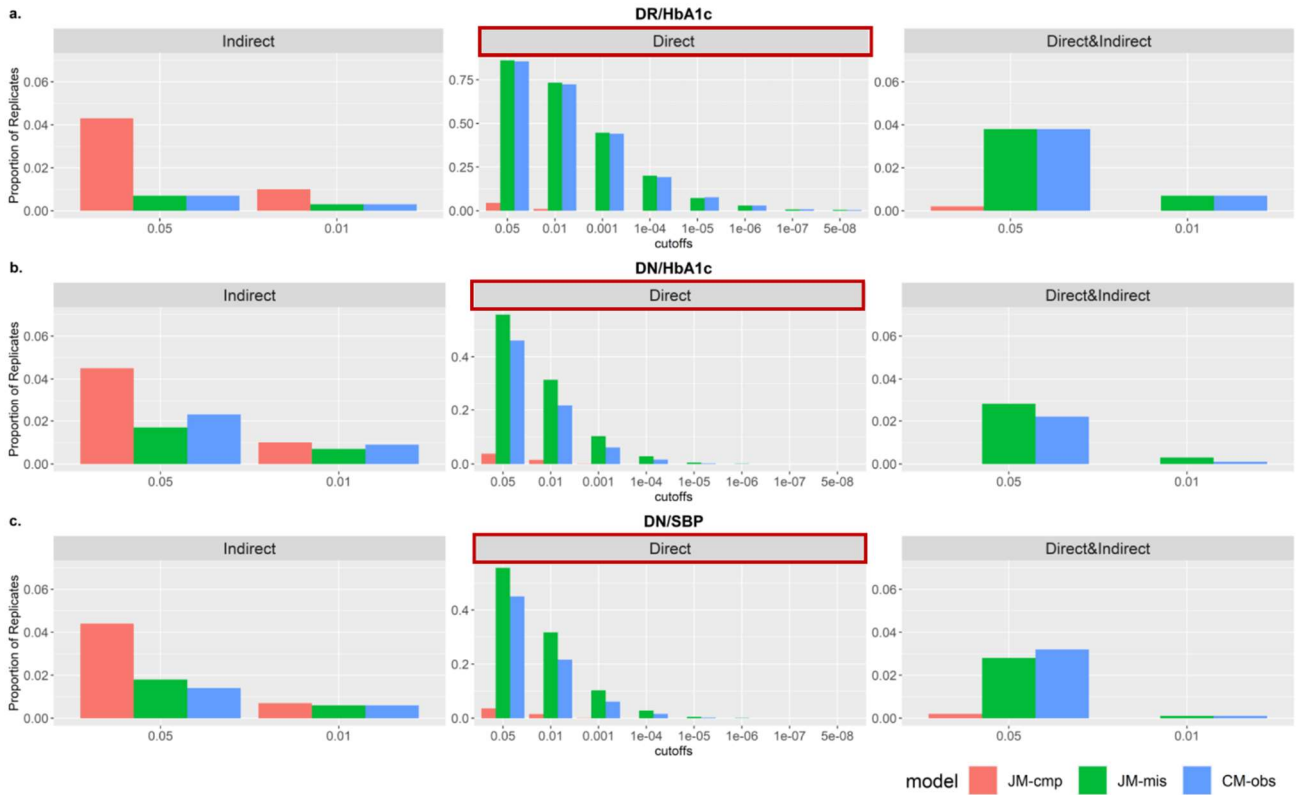

### SNP4

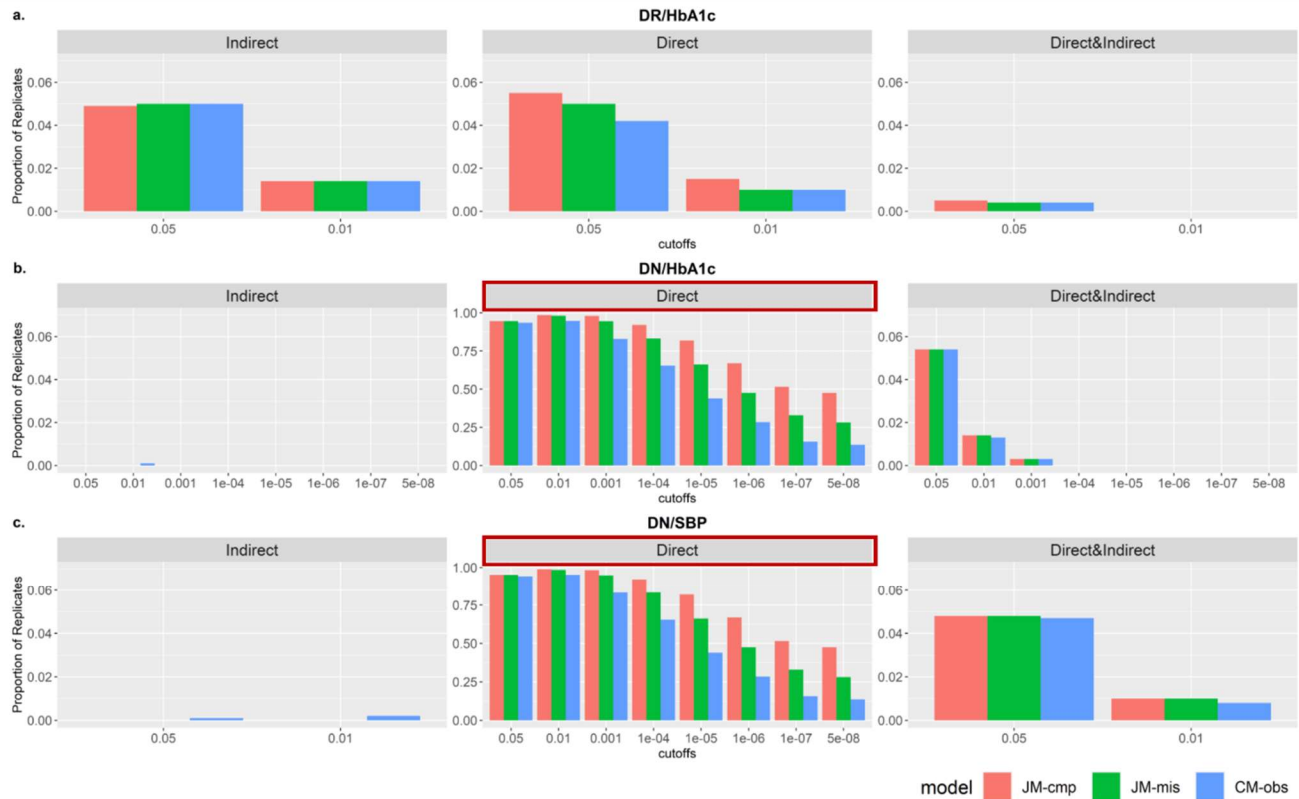

# SNP5

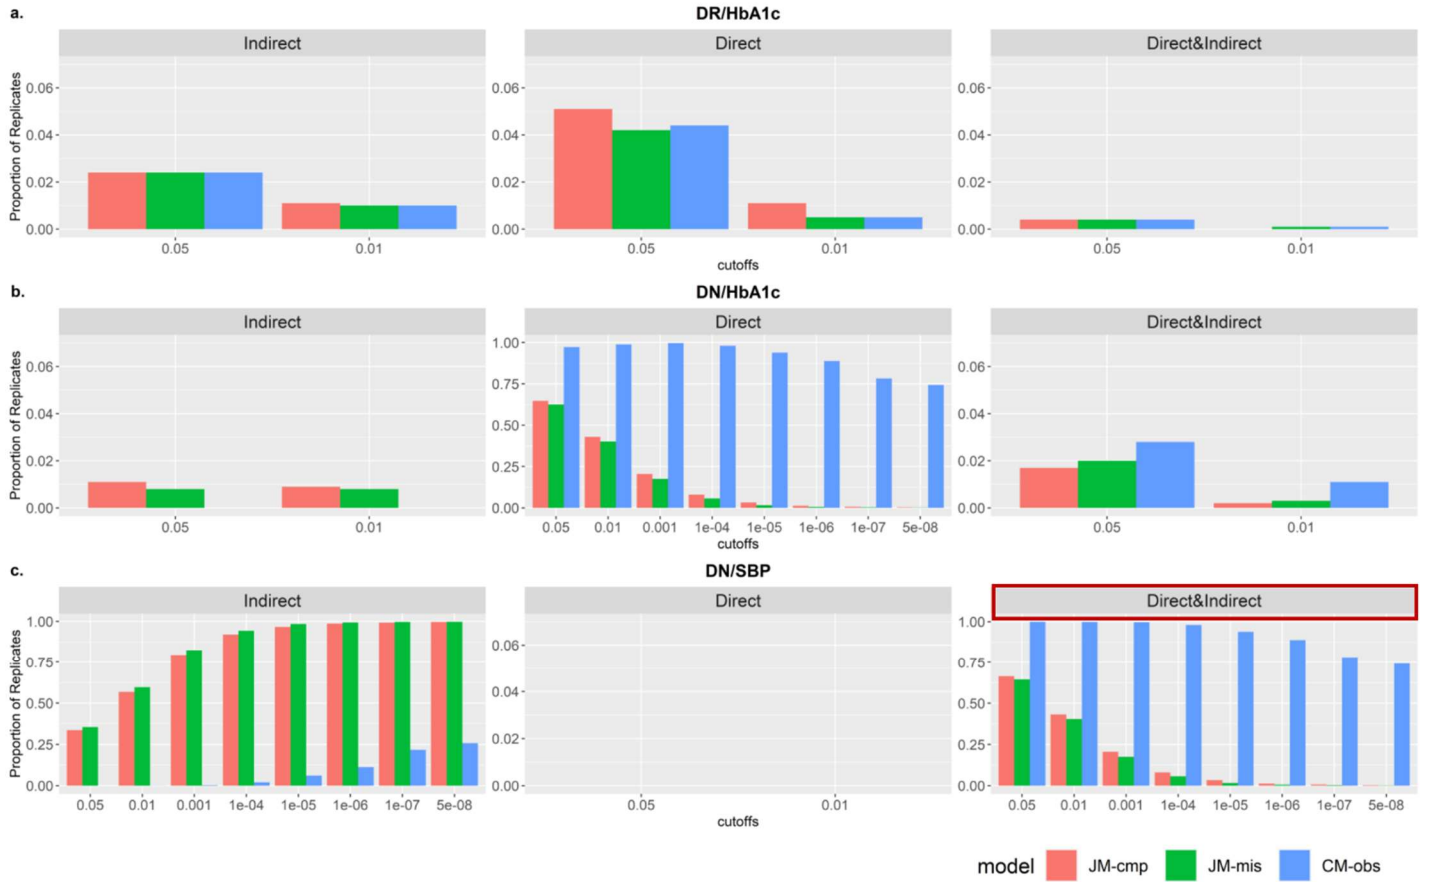



**Figure S5.** Classification of direct and/or indirect SNP association for 307 candidate SNPs tested in  $N=516$  DCCT subjects using the contemporaneous association structure and the two alternative *cumulative* association structures (updated cumulative mean and time-weighted cumulative) for HbA1c effects on time-to-T1DC traits. Scatter plots represent the P-values ( $-\log_{10}$ ) for tests of  $\beta_{g(l)}$  (X axis) and  $\gamma_{g(k)}$  (Y axis) for DR/HbA1c, DN/HbA1c and DN/SBP trait pairs respectively based on: **(a.)** the joint model results and **(b.)** same results as (a.) on the X axis but substituting  $P_{\gamma_{g(k)}}$  from CM-obs to assess the impact of measurement errors in longitudinal traits on the classification of direct and/or indirect associations. Significance levels  $P^* = 1.7 \times 10^{-4}$  and  $P^* = 0.05$  are indicated by red and dark grey lines.

(see **Figure S5** on next page)

a. Joint model results

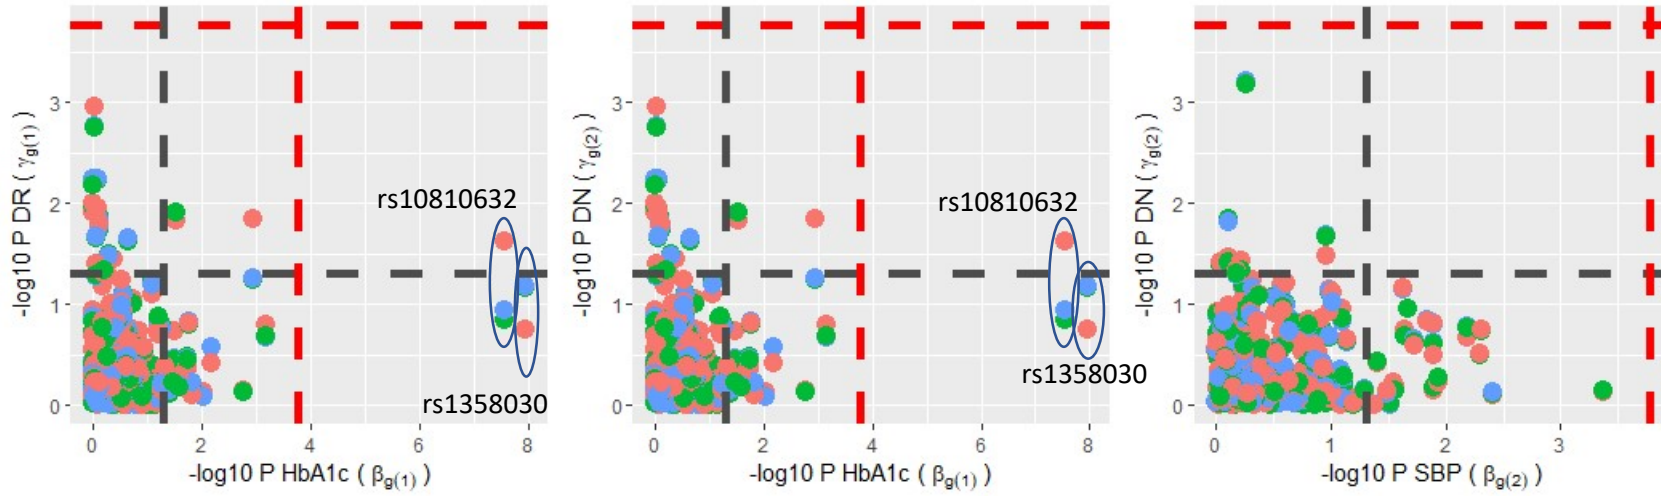

b. CM-obs results

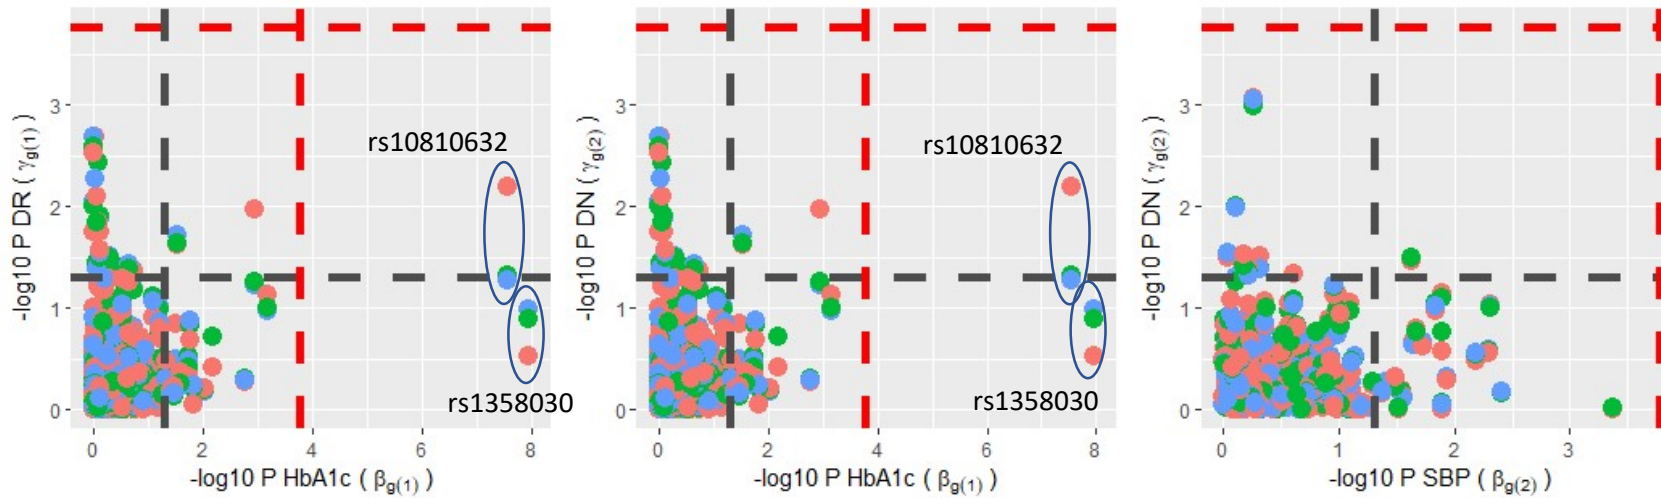

Time-dependent association structures for HbA1c effects on each time-to-T1DC trait

- Contemporaneous
- Time-weighted cumulative
- Updated cumulative mean
